# Supplementary material
Source: publisher site journal article supplement (https://www.spandidos-publications.com/8646/downloadSupplementary)
Supplement: Supplementary file 1 [file downloadSupplementary]

Table SI. Summary of select therapeutic approaches and outcomes in pulmonary carcinoid from recent literature.

| First author/s, year             | Category                             | Patient/study characteristics                                              | Treatment intervention                                                                                                                           | Reported efficacy outcome                                                                                                                                                             | (Refs.) |
|----------------------------------|--------------------------------------|----------------------------------------------------------------------------|--------------------------------------------------------------------------------------------------------------------------------------------------|---------------------------------------------------------------------------------------------------------------------------------------------------------------------------------------|---------|
| Trpezanovski <i>et al</i> , 2025 | 1. Novel systemic/targeted therapies | 13 y/o female, bronchial carcinoid, neoadjuvant setting                    | Lu-177 DOTATATE (PRRT) multi-cycle, dose-escalated                                                                                               | Significant metabolic response in nodal mets; PR of primary tumor; well-tolerated.                                                                                                    | (17)    |
| Cooper <i>et al</i> , 2024       |                                      | Metastatic Pulmonary Carcinoid, DLL3+, progressed on prior therapies       | Tarlatamab (DLL3-targeting BiTE)                                                                                                                 | Clinical response observed in DLL3-expressing metastatic atypical carcinoid.                                                                                                          | (18)    |
| Owen <i>et al</i> , 2023         | 2. Immunotherapy and combinations    | Subgroup of 11 patients with lung NETs                                     | Combination nivolumab and temozolomide                                                                                                           | ORR: 64% (7/11) in lung NET subgroup (lung vs. others, P=0.02).                                                                                                                       | (16)    |
| Hu <i>et al</i> , 2024           | 3. Other notable management          | 58 y/o female, mixed atypical carcinoid & adenocarcinoma (ALK+)            | Lobectomy + adjuvant chemo (etoposide/carboplatin x4). Recommended second-generation ALK-TKI targeted antitumor therapy, but the patient refused | Surgical resection performed; no tumor recurrence has been observed after 1 year of follow-up.                                                                                        | (19)    |
| Çağan <i>et al</i> , 2025        |                                      | 77 y/o male, metachronous contralateral carcinoid (7 yrs post-lobectomy)   | Initial lobectomy, then contralateral recurrence managed                                                                                         | Highlights need for long-term surveillance.                                                                                                                                           | (20)    |
| Aldrete <i>et al</i> , 2024      |                                      | 32 y/o female, severe ectopic ACTH syndrome from Pulmonary Carcinoid       | Steroidogenesis inhibitors → cryoablation (palliative)                                                                                           | Patient died 6 months post-diagnosis (aggressive course).                                                                                                                             | (21)    |
| Bostan <i>et al</i> , 2022       |                                      | 43 y/o male, metastatic NET of unknown primary (atypical carcinoid likely) | Somatostatin analogs + CAPTEM (capecitabine 4500 mg/day for 14 days/temozolomide 360 mg/day for 5 days)                                          | Treatment initiated after hypercortisolism control with 9 month follow up. A significant decrease was observed in the number, size, and metabolic activity uptake of metastatic foci. | (22)    |
